# Supplementary material for: Biological and genetic structure of Epinephelus costae (Steindachner, 1878) population in Iskenderun Bay, eastern Mediterranean Sea
Source: PeerJ. 2025 Jun 19;13:e19594. doi: 10.7717/peerj.19594 (PMC12182727; doi:10.7717/peerj.19594)
Supplement: Supplemental Information 1 [file peerj-13-19594-s001.xls]

## Sheet: MatrixOutput
	Seq1	Seq2	Seq3	Seq4	Seq5	Seq6	Seq7	Seq8	Seq9	Seq10	Seq11	Seq12	Seq13	Seq14	Seq15	Seq16	Seq17	Seq18	Seq19	Seq20	Seq21	Seq22	Seq23	Seq24	Seq25	Seq26	Seq27	Seq28	Seq29	Seq30
Seq1		0.0026443	0.00731553	0.00210237	0.00774214	0.013117	0.0013237	0.00367207	0.00285918	0.0013237	0.00376224	0.00266522	0.00234023	0.00199699	0.00454105	0.0126023	0.00331481	0.00150869	0.00251237	0.00213431	0.00648465	0.00141115	0.00751343	0.0125965	0.00369624	0.00210854	0.00151438	0	0	0
Seq2	0.00618003		0.00799034	0.00307714	0.00813255	0.0132653	0.00316146	0.0043625	0.00414411	0.00316146	0.00473231	0.00346173	0.00375438	0.00344161	0.00552249	0.0129097	0.00392804	0.00298226	0.00339069	0.00298399	0.00735172	0.00240511	0.00842456	0.0129055	0.00472718	0.00284273	0.00335393	0.0026443	0.0026443	0.0026443
Seq3	0.0314287	0.0378805		0.00689834	0.0119585	0.0170655	0.00699524	0.00846354	0.00750222	0.00699524	0.00779611	0.00745676	0.00753531	0.00786782	0.00794339	0.0163521	0.00773814	0.0078724	0.00794236	0.00801512	0.00275815	0.00717206	0.0118783	0.0159594	0.00735811	0.00746154	0.00702729	0.00731553	0.00731553	0.00731553
Seq4	0.00308345	0.00928986	0.0282241		0.00852209	0.0135995	0.00141115	0.00360616	0.00245824	0.00141115	0.00403627	0.00195219	0.00329653	0.00277151	0.00478097	0.0130513	0.00261928	0.00276935	0.00308994	0.00313529	0.006774	0.0013237	0.00823022	0.0129978	0.00384936	0.00195138	0.00258595	0.00210237	0.00210237	0.00210237
Seq5	0.0460011	0.0460011	0.0693233	0.0460084		0.0146388	0.00831289	0.00878825	0.00811014	0.00831289	0.00873137	0.00847439	0.00811168	0.008356	0.0093272	0.0138905	0.00871391	0.00779133	0.00826634	0.00770168	0.0111471	0.0080132	0.00315395	0.0136436	0.00880551	0.00794748	0.00800139	0.00774214	0.00774214	0.00774214
Seq6	0.100385	0.104095	0.134898	0.103962	0.137831		0.0133424	0.013653	0.0133914	0.0133424	0.0135294	0.0134612	0.0135377	0.013287	0.0140155	0.00482397	0.0136116	0.0130983	0.0128369	0.013155	0.0163267	0.0133451	0.0145691	0.00523231	0.0135416	0.0132334	0.0135606	0.013117	0.013117	0.013117
Seq7	0.00154083	0.00773524	0.029821	0.00154024	0.0476431	0.102236		0.00318938	0.00234393	0	0.00356737	0.00266522	0.00276344	0.00199699	0.00444465	0.0127652	0.00331481	0.00199617	0.00282975	0.00247327	0.00688197	0.00210237	0.00802506	0.0127383	0.00350637	0.00266313	0.00211693	0.0013237	0.0013237	0.0013237
Seq8	0.00928804	0.0155454	0.0378649	0.00928987	0.0542222	0.107558	0.00773283		0.00344703	0.00318938	0.00464747	0.00433773	0.00381957	0.00347293	0.00514957	0.0127982	0.00411434	0.00347322	0.00413022	0.00312616	0.00841412	0.0041248	0.00859781	0.0126482	0.00459851	0.00433453	0.00411393	0.00367207	0.00367207	0.00367207
Seq9	0.00617943	0.01241	0.0314216	0.00308405	0.0460084	0.105565	0.00463144	0.0124149		0.00234393	0.004604	0.00294757	0.00377964	0.00332654	0.00548925	0.0128251	0.0036205	0.00332296	0.00377272	0.00328941	0.00763943	0.00283873	0.00784329	0.0127389	0.00448509	0.00294433	0.00323757	0.00285918	0.00285918	0.00285918
Seq10	0.00154083	0.00773524	0.029821	0.00154024	0.0476431	0.102236	0	0.00773283	0.00463144		0.00356737	0.00266522	0.00276344	0.00199699	0.00444465	0.0127652	0.00331481	0.00199617	0.00282975	0.00247327	0.00688197	0.00210237	0.00802506	0.0127383	0.00350637	0.00266313	0.00211693	0.0013237	0.0013237	0.0013237
Seq11	0.0171302	0.023447	0.0492764	0.0202817	0.0642141	0.115925	0.0187	0.023447	0.0234565	0.0187		0.00430459	0.003906	0.00350731	0.00254076	0.013034	0.00428384	0.00369624	0.00404781	0.00422134	0.00730601	0.00412532	0.00861589	0.0129242	0.00150869	0.00436108	0.00408349	0.00376224	0.00376224	0.00376224
Seq12	0.00463144	0.0108475	0.0314216	0.00308405	0.0476371	0.105565	0.00463144	0.0124149	0.00618244	0.00463144	0.0218792		0.00372732	0.00287118	0.0049374	0.0129633	0.00300686	0.00329859	0.00328479	0.00357289	0.00706561	0.00195219	0.00832541	0.0129548	0.00406438	0.00132254	0.00302941	0.00266522	0.00266522	0.00266522
Seq13	0.00308345	0.00928986	0.0314216	0.00618003	0.0492818	0.102107	0.00463144	0.00928986	0.00928804	0.00463144	0.0171221	0.00773283		0.00211243	0.00441266	0.0130434	0.00290027	0.00151438	0.00272038	0.00206858	0.00687593	0.00283088	0.00787577	0.0129592	0.00408349	0.00328768	0.00150869	0.00234023	0.00234023	0.00234023
Seq14	0.00308405	0.00928804	0.0330261	0.00463144	0.0492771	0.101982	0.00308405	0.00773283	0.00773707	0.00308405	0.0171302	0.00463144	0.00308345		0.00432059	0.0127152	0.00263393	0.00132254	0.00251073	0.00204406	0.00756066	0.00277151	0.00806071	0.0126031	0.00356856	0.00329859	0.00276084	0.00199699	0.00199699	0.00199699
Seq15	0.0186944	0.0250286	0.0509245	0.0218546	0.0658884	0.117926	0.0202717	0.0250286	0.0250318	0.0202717	0.00463144	0.023447	0.0186926	0.0186944		0.0133761	0.00455596	0.00441217	0.00473529	0.00490911	0.00753191	0.00479814	0.00918386	0.013191	0.0032588	0.00493177	0.0046425	0.00454105	0.00454105	0.00454105
Seq16	0.0900071	0.0952424	0.124043	0.0935367	0.130751	0.0155497	0.0918352	0.0986663	0.095114	0.0918352	0.105323	0.095114	0.0917052	0.0915794	0.1073		0.01308	0.0125828	0.0123357	0.0126055	0.0156881	0.0128584	0.0137706	0.00194894	0.013046	0.0127921	0.0130671	0.0126023	0.0126023	0.0126023
Seq17	0.00618244	0.0124106	0.0330261	0.00463144	0.0492771	0.105442	0.00618244	0.0108505	0.00773707	0.00618244	0.0202924	0.00617943	0.00617943	0.00462964	0.0202817	0.0949898		0.00263546	0.003108	0.00300278	0.00751197	0.00261928	0.00832111	0.0129611	0.00454157	0.00300952	0.00365826	0.00331481	0.00331481	0.00331481
Seq18	0.00154024	0.00773223	0.0330319	0.00462964	0.0476371	0.100259	0.00308345	0.00773223	0.00773283	0.00308345	0.0155547	0.00618244	0.00154083	0.00154024	0.0171178	0.0898804	0.00463144		0.00213786	0.00160248	0.00720679	0.00229671	0.00755544	0.0124916	0.00376224	0.00287118	0.00234023	0.00150869	0.00150869	0.00150869
Seq19	0.00462964	0.0108481	0.0362572	0.00773223	0.0509245	0.100137	0.00618003	0.0108481	0.0108475	0.00618003	0.0187	0.00928987	0.00463144	0.00462964	0.0202717	0.0897579	0.00773283	0.00308345		0.00273574	0.00730309	0.00267814	0.00804606	0.01244	0.00403721	0.00286294	0.00317156	0.00251237	0.00251237	0.00251237
Seq20	0.00308405	0.00928804	0.034639	0.00617943	0.0492771	0.101982	0.00462964	0.00618003	0.00928987	0.00462964	0.0171302	0.00773707	0.00308345	0.00308405	0.0186944	0.0915794	0.00618244	0.00154024	0.00462964		0.00727467	0.00275296	0.00766763	0.0125023	0.00424307	0.00320345	0.00267798	0.00213431	0.00213431	0.00213431
Seq21	0.029821	0.0362572	0.00463682	0.0298293	0.0676226	0.132956	0.0314287	0.0394883	0.0330319	0.0314287	0.0476371	0.0314216	0.0298165	0.0330261	0.0492771	0.122127	0.0330261	0.0314216	0.034639	0.0330261		0.00642698	0.0109881	0.0152271	0.00672659	0.0067242	0.00620077	0.00648465	0.00648465	0.00648465
Seq22	0.00154024	0.00773223	0.0298293	0.00154083	0.0443691	0.102107	0.00308345	0.0108475	0.00462964	0.00308345	0.0187094	0.00308405	0.00462964	0.00463144	0.0202748	0.0917052	0.00463144	0.00308405	0.00617943	0.00463144	0.0282241		0.00778021	0.0128256	0.00393618	0.0013587	0.00195335	0.00141115	0.00141115	0.00141115
Seq23	0.0427351	0.0459977	0.065948	0.042741	0.00617943	0.137956	0.0443691	0.0525713	0.042741	0.0443691	0.0608716	0.0443644	0.0460011	0.0459977	0.0625362	0.127045	0.0459977	0.0443644	0.0476371	0.0459977	0.064256	0.0411097		0.0135687	0.00869725	0.00786549	0.00777128	0.00751343	0.00751343	0.00751343
Seq24	0.0863707	0.0915794	0.120218	0.0898804	0.126919	0.0187093	0.0881856	0.0968247	0.0914577	0.0881856	0.103474	0.0914577	0.0898804	0.0897579	0.105442	0.00308643	0.0931617	0.0880622	0.0915794	0.0897579	0.118317	0.0880622	0.123235		0.013105	0.0128022	0.0130166	0.0125965	0.0125965	0.0125965
Seq25	0.0155547	0.021859	0.0476351	0.0187	0.0625383	0.116043	0.0171221	0.0250387	0.0218672	0.0171221	0.00154024	0.0202924	0.0187	0.0187094	0.00618003	0.105442	0.0218792	0.0171302	0.0202817	0.0187094	0.0459984	0.0171302	0.0592029	0.101745		0.00411915	0.003906	0.00369624	0.00369624	0.00369624
Seq26	0.00308405	0.00928804	0.0314287	0.00308345	0.0460011	0.103834	0.00462964	0.0124106	0.00617943	0.00462964	0.0202924	0.00154024	0.00617943	0.00618244	0.021859	0.0934075	0.00618244	0.00463144	0.00773283	0.00618244	0.029821	0.00154024	0.0427351	0.0897579	0.0187094		0.0024672	0.00210854	0.00210854	0.00210854
Seq27	0.00154083	0.00773524	0.029821	0.00463144	0.0476431	0.102236	0.00308643	0.0108481	0.00773223	0.00308643	0.0187	0.00617943	0.00154024	0.00462964	0.0202717	0.0918352	0.00773283	0.00308345	0.00618003	0.00462964	0.0282184	0.00308345	0.0443691	0.0881856	0.0171221	0.00462964		0.00151438	0.00151438	0.00151438
Seq28	0	0.00618003	0.0314287	0.00308345	0.0460011	0.100385	0.00154083	0.00928804	0.00617943	0.00154083	0.0171302	0.00463144	0.00308345	0.00308405	0.0186944	0.0900071	0.00618244	0.00154024	0.00462964	0.00308405	0.029821	0.00154024	0.0427351	0.0863707	0.0155547	0.00308405	0.00154083		0	0
Seq29	0	0.00618003	0.0314287	0.00308345	0.0460011	0.100385	0.00154083	0.00928804	0.00617943	0.00154083	0.0171302	0.00463144	0.00308345	0.00308405	0.0186944	0.0900071	0.00618244	0.00154024	0.00462964	0.00308405	0.029821	0.00154024	0.0427351	0.0863707	0.0155547	0.00308405	0.00154083	0		0
Seq30	0	0.00618003	0.0314287	0.00308345	0.0460011	0.100385	0.00154083	0.00928804	0.00617943	0.00154083	0.0171302	0.00463144	0.00308345	0.00308405	0.0186944	0.0900071	0.00618244	0.00154024	0.00462964	0.00308405	0.029821	0.00154024	0.0427351	0.0863707	0.0155547	0.00308405	0.00154083	0	0

## Sheet: Caption
Table. Estimates of Evolutionary Divergence between Sequences
The number of base substitutions per site from between sequences are shown. Standard error estimate(s) are shown above the diagonal. Analyses were conducted using the Kimura 2-parameter model [1]. This analysis involved 30 nucleotide sequences. Codon positions included were 1st+2nd+3rd+Noncoding. All ambiguous positions were removed for each sequence pair (pairwise deletion option). There were a …
1. Kimura M. (1980). A simple method for estimating evolutionary rate of base substitutions through comparative studies of nucleotide sequences. Journal of Molecular Evolution 16:111-120.
2. Kumar S., Stecher G., Li M., Knyaz C., and Tamura K. (2018). MEGA X: Molecular Evolutionary Genetics Analysis across computing platforms. Molecular Biology and Evolution 35:1547-1549.
Disclaimer: Although utmost care has been taken to ensure the correctness of the caption, the caption text is provided "as is" without any warranty of any kind. Authors advise the user to carefully check the caption prior to its use for any purpose and report any errors or problems to the authors immediately (www.megasoftware.net). In no event shall the authors and their employers be liable for a…
