# Supplementary material for: Biological and genetic structure of Epinephelus costae (Steindachner, 1878) population in Iskenderun Bay, eastern Mediterranean Sea
Source: PeerJ. 2025 Jun 19;13:e19594. doi: 10.7717/peerj.19594 (PMC12182727; doi:10.7717/peerj.19594)
Supplement: Supplemental Information 2 — Length-weight and age data used in the study. [file peerj-13-19594-s002.xlsx]

## Sheet: LWR
No	Total Lenght (cm)	Weight (g)	Age	Log L	Log W
1	16.7	55.75	1	1.22272	1.74624
2	16.7	51.75	1	1.22272	1.71391
3	17.3	58.05	1	1.23805	1.7638
4	17.4	58.25	1	1.24055	1.7653
5	18.5	73.25	1	1.26717	1.86481
6	18.6	74.48	1	1.26951	1.87204
7	19.8	91.92	1	1.29667	1.96341
8	20	121.29	1	1.30103	2.08382
9	20.3	125.35	1	1.3075	2.09812
10	20.1	91.3	1	1.3032	1.96047
11	20.2	87.2	1	1.30535	1.94052
12	20.5	109.47	1	1.31175	2.0393
13	20.5	88.5	1	1.31175	1.94694
14	20.5	109.53	1	1.31175	2.03953
15	20.6	121.22	1	1.31387	2.08357
16	20.9	129.12	1	1.32015	2.11099
17	20.9	122.26	1	1.32015	2.08728
18	20.9	119.17	1	1.32015	2.07617
19	20.9	111.66	1	1.32015	2.0479
20	21.1	125.21	1	1.32428	2.09764
21	20.9	121.2	1	1.32015	2.0835
22	20.8	115.6	1	1.31806	2.06296
23	21.3	108.21	1	1.32838	2.03427
24	21.4	121.78	1	1.33041	2.08558
25	21.2	132.13	1	1.32634	2.121
26	21.1	108.3	1	1.32428	2.03463
27	21.4	112.16	1	1.33041	2.04984
28	21.2	116.52	1	1.32634	2.0664
29	21	99.25	1	1.32222	1.99673
30	21.2	115.2	1	1.32634	2.06145
31	21.1	117.5	1	1.32428	2.07004
32	21	100.78	1	1.32222	2.00337
33	21	122.55	1	1.32222	2.08831
34	21	126.46	1	1.32222	2.10195
35	21.3	106.9	1	1.32838	2.02898
36	21.4	106.7	1	1.33041	2.02816
37	21.5	125.87	1	1.33244	2.09992
38	21.5	135.77	1	1.33244	2.1328
39	21.8	128.36	1	1.33846	2.10843
40	21.5	132.57	1	1.33244	2.12245
41	21.6	129.65	1	1.33445	2.11277
42	21.6	137.23	1	1.33445	2.13745
43	21.6	142.36	1	1.33445	2.15339
44	21.6	152.47	1	1.33445	2.18318
45	21.8	127.57	1	1.33846	2.10575
46	21.8	138.59	1	1.33846	2.14173
47	21.8	134.26	1	1.33846	2.12795
48	21.9	112.58	1	1.34044	2.05146
49	21.9	106.4	1	1.34044	2.02694
50	22	132.7	1	1.34242	2.12287
51	22	126.88	1	1.34242	2.10339
52	22	139.2	1	1.34242	2.14364
53	22	128.9	1	1.34242	2.11025
54	22.1	131.5	1	1.34439	2.11893
55	22.1	131.78	1	1.34439	2.11985
56	22.2	133.78	1	1.34635	2.12639
57	22.2	141.3	1	1.34635	2.15014
58	22.4	142.25	1	1.35025	2.15305
59	22.4	135.62	1	1.35025	2.13232
60	22.4	130.15	1	1.35025	2.11444
61	22.4	127.25	1	1.35025	2.10466
62	22.5	130.68	1	1.35218	2.11621
63	22.5	132.78	1	1.35218	2.12313
64	22.5	128.69	1	1.35218	2.10954
65	22.5	122.52	1	1.35218	2.08821
66	22.7	125.69	1	1.35603	2.0993
67	22.7	127.17	1	1.35603	2.10438
68	22.8	125.48	1	1.35793	2.09857
69	22.8	120.18	1	1.35793	2.07983
70	22.8	122.5	1	1.35793	2.08814
71	22.9	123.78	1	1.35984	2.09265
72	22.9	131.65	1	1.35984	2.11942
73	22.9	135.9	1	1.35984	2.13322
74	22.8	130.62	1	1.35793	2.11601
75	22.9	136.89	1	1.35984	2.13637
76	22.9	140.68	1	1.35984	2.14823
77	22.8	151.27	1	1.35793	2.17975
78	22.9	132.02	1	1.35984	2.12064
79	23.1	147.98	1	1.36361	2.1702
80	23.2	145.2	1	1.36549	2.16197
81	23.2	139.23	1	1.36549	2.14373
82	23.2	142.98	1	1.36549	2.15528
83	23.2	157.25	1	1.36549	2.19659
84	23.2	141.22	1	1.36549	2.1499
85	23.3	157.6	1	1.36736	2.19756
86	23.4	154.98	1	1.36922	2.19028
87	23.5	156.78	1	1.37107	2.19529
88	23.6	142.17	1	1.37291	2.15281
89	23.6	159.54	1	1.37291	2.20287
90	23.7	162.65	1	1.37475	2.21125
91	23.8	137.94	1	1.37658	2.13969
92	23.9	148.32	1	1.3784	2.1712
93	23.9	168.59	1	1.3784	2.22683
94	23.9	158.12	1	1.3784	2.19899
95	23.9	138.45	1	1.3784	2.14129
96	24	159.24	2	1.38021	2.20205
97	24	171.58	2	1.38021	2.23447
98	24	154.56	2	1.38021	2.1891
99	24	198.67	2	1.38021	2.29813
100	24.1	172.56	2	1.38202	2.23694
101	24.1	176.24	1	1.38202	2.2461
102	24.1	175.68	2	1.38202	2.24472
103	24.1	179.65	2	1.38202	2.25443
104	24.2	154.2	2	1.38382	2.18808
105	24.2	157.58	2	1.38382	2.1975
106	24.2	142.69	2	1.38382	2.15439
107	24.2	144.36	2	1.38382	2.15945
108	24.2	170.25	2	1.38382	2.23109
109	24.2	167.69	2	1.38382	2.22451
110	24.2	175.47	1	1.38382	2.2442
111	24.2	149.19	1	1.38382	2.17374
112	24.3	178.22	2	1.38561	2.25096
113	24.3	182.14	2	1.38561	2.26041
114	24.3	176.53	2	1.38561	2.24682
115	24.4	173.29	2	1.38739	2.23877
116	24.5	178.98	2	1.38917	2.2528
117	24.6	181.22	2	1.39094	2.25821
118	24.7	174.49	2	1.3927	2.24177
119	24.3	177.36	2	1.38561	2.24886
120	24.8	192.56	2	1.39445	2.28457
121	24.8	186.12	2	1.39445	2.26979
122	24.8	179.52	2	1.39445	2.25411
123	24.8	189.22	2	1.39445	2.27697
124	25.2	190.58	2	1.4014	2.28008
125	25.1	186.14	2	1.39967	2.26984
126	25.4	190.87	2	1.40483	2.28074
127	25.2	182.22	2	1.4014	2.2606
128	25.5	190.27	2	1.40654	2.27937
129	25.5	191.22	2	1.40654	2.28153
130	25.5	195.25	2	1.40654	2.29059
131	25.5	186.5	2	1.40654	2.27068
132	25.8	192.37	2	1.41162	2.28414
133	25.8	182.27	2	1.41162	2.26072
134	25.8	195.68	2	1.41162	2.29155
135	25.8	188.78	2	1.41162	2.27596
136	25.9	189.88	2	1.4133	2.27848
137	25.9	195.36	2	1.4133	2.29084
138	25.9	186.28	2	1.4133	2.27017
139	26	200.58	2	1.41497	2.30229
140	26	215.77	2	1.41497	2.33399
141	26	207.69	2	1.41497	2.31742
142	26.2	212.52	2	1.4183	2.3274
143	26.2	217.25	2	1.4183	2.33696
144	26.2	215.66	2	1.4183	2.33377
145	26.3	200.78	2	1.41996	2.30272
146	26.4	205.3	2	1.4216	2.31239
147	26.4	199.25	2	1.4216	2.2994
148	26.5	215.25	2	1.42325	2.33294
149	26.8	198.2	2	1.42813	2.2971
150	26.8	188.92	2	1.42813	2.27628
151	26.9	195.3	2	1.42975	2.2907
152	26.9	188.24	2	1.42975	2.27471
153	26.9	201.25	2	1.42975	2.30374
154	26.9	205.35	2	1.42975	2.31249
155	26.9	199.64	2	1.42975	2.30025
156	26.9	195.87	2	1.42975	2.29197
157	26.9	199.2	2	1.42975	2.29929
158	26.9	201.15	2	1.42975	2.30352
159	26.9	192.5	2	1.42975	2.28443
160	27.1	210.58	2	1.43297	2.32342
161	27.1	212.25	2	1.43297	2.32685
162	27.1	208.74	2	1.43297	2.31961
163	27.2	212.5	2	1.43457	2.32736
164	27.2	215.29	2	1.43457	2.33302
165	27.2	216.28	2	1.43457	2.33502
166	27.4	230.89	2	1.43775	2.36341
167	27.4	225.17	2	1.43775	2.35251
168	27.4	219.78	2	1.43775	2.34199
169	27.6	212.8	2	1.44091	2.32797
170	27.6	228.69	2	1.44091	2.35925
171	27.6	220.87	2	1.44091	2.34414
172	27.6	220.35	2	1.44091	2.34311
173	27.6	222.13	2	1.44091	2.34661
174	27.6	232.18	2	1.44091	2.36582
175	27.8	232.35	2	1.44404	2.36614
176	27.8	242.5	2	1.44404	2.38471
177	27.8	240.25	2	1.44404	2.38066
178	28.1	254.12	2	1.44871	2.40504
179	28.1	235.89	2	1.44871	2.37271
180	28.1	287.96	2	1.44871	2.45933
181	28.2	298.23	2	1.45025	2.47455
182	28.2	278.3	2	1.45025	2.44451
183	28.2	308.39	2	1.45025	2.4891
184	28.4	279.45	2	1.45332	2.4463
185	28.4	285.11	2	1.45332	2.45501
186	28.4	300.87	2	1.45332	2.47838
187	28.6	290.34	2	1.45637	2.46291
188	28.6	305.2	2	1.45637	2.48458
189	28.6	308.25	2	1.45637	2.4889
190	29.4	320.1	2	1.46835	2.50529
191	29.4	315.3	2	1.46835	2.49872
192	29.4	322.9	2	1.46835	2.50907
193	29.4	329.2	2	1.46835	2.51746
194	29.4	331.25	2	1.46835	2.52016
195	29.4	342.2	2	1.46835	2.53428
196	29.7	329.17	2	1.47276	2.51742
197	29.7	325.2	2	1.47276	2.51215
198	29.7	319.78	2	1.47276	2.50485
199	30.4	330.54	3	1.48287	2.51922
200	30.4	335.17	3	1.48287	2.52527
201	30.4	342.89	3	1.48287	2.53515
202	30.9	366.95	3	1.48996	2.56461
203	30.9	372.12	3	1.48996	2.57068
204	30.9	376.89	3	1.48996	2.57621
205	32.1	377.52	3	1.50651	2.57694
206	32.1	388.47	3	1.50651	2.58936
207	32.1	387.52	3	1.50651	2.58829
208	32.2	398.14	3	1.50786	2.60004
209	32.2	397.21	3	1.50786	2.59902
210	32.2	405.15	3	1.50786	2.60762
211	32.2	400.17	2	1.50786	2.60224
212	32.2	401.78	3	1.50786	2.60399
213	32.2	399.47	3	1.50786	2.60148
214	32.3	405.23	3	1.5092	2.6077
215	32.3	410.25	2	1.5092	2.61305
216	32.3	402.95	2	1.5092	2.60525
217	32.5	413.22	3	1.51188	2.61618
218	32.5	405.82	3	1.51188	2.60833
219	32.5	403.58	3	1.51188	2.60593
220	32.6	402.57	3	1.51322	2.60484
221	32.6	412.57	3	1.51322	2.6155
222	32.6	409.22	3	1.51322	2.61196
223	32.8	413.98	3	1.51587	2.61698
224	32.8	400.89	3	1.51587	2.60303
225	32.8	415.2	3	1.51587	2.61826
226	32.8	411.54	3	1.51587	2.61441
227	32.8	421.36	3	1.51587	2.62465
228	32.8	420.89	3	1.51587	2.62417
229	32.9	408.48	3	1.5172	2.61117
230	32.9	419.58	3	1.5172	2.62281
231	32.9	420.37	3	1.5172	2.62363
232	33.1	423.28	3	1.51983	2.62663
233	33.1	418.25	3	1.51983	2.62144
234	33.1	437.35	3	1.51983	2.64083
235	33.5	447.2	3	1.52504	2.6505
236	33.5	437.9	3	1.52504	2.64137
237	33.5	445.88	3	1.52504	2.64922
238	33.5	468.9	3	1.52504	2.67108
239	33.5	477.24	3	1.52504	2.67874
240	33.6	470.85	3	1.52634	2.67288
241	33.6	465.6	3	1.52634	2.66801
242	33.6	456.97	3	1.52634	2.65989
243	33.6	444.98	3	1.52634	2.64834
244	33.7	453.17	3	1.52763	2.65626
245	33.7	468.58	3	1.52763	2.67078
246	33.8	478.25	3	1.52892	2.67965
247	33.8	472.58	3	1.52892	2.67448
248	33.9	479.99	3	1.5302	2.68123
249	33.9	483.15	3	1.5302	2.68408
250	34.1	485.2	3	1.53275	2.68592
251	34.1	498.55	3	1.53275	2.69771
252	34.4	506.78	3	1.53656	2.70482
253	34.4	512.22	3	1.53656	2.70946
254	34.5	508.34	3	1.53782	2.70615
255	34.5	513.32	3	1.53782	2.71039
256	34.7	518.34	3	1.54033	2.71461
257	34.7	528.39	3	1.54033	2.72295
258	35.1	539.11	3	1.54531	2.73168
259	35.1	510.89	3	1.54531	2.70833
260	35.2	548.52	3	1.54654	2.73919
261	35.2	543.37	3	1.54654	2.7351
262	35.4	545.28	3	1.549	2.73662
263	35.4	541.22	3	1.549	2.73337
264	35.7	552.69	3	1.55267	2.74248
265	35.7	549.88	3	1.55267	2.74027
266	35.9	568.9	3	1.55509	2.75504
267	35.9	575.36	3	1.55509	2.75994
268	36.1	572.58	4	1.55751	2.75784
269	36.1	620.14	4	1.55751	2.79249
270	36.2	598.57	4	1.55871	2.77711
271	36.2	587.85	4	1.55871	2.76927
272	36.5	599.7	4	1.56229	2.77793
273	36.5	602.14	4	1.56229	2.7797
274	36.9	615.17	4	1.56703	2.789
275	36.9	612.25	4	1.56703	2.78693
276	37	612.52	4	1.5682	2.78712
277	37	622.28	4	1.5682	2.79399
278	37.1	619.71	4	1.56937	2.79219
279	37.1	625.1	4	1.56937	2.79595
280	37.2	622.36	3	1.57054	2.79404
281	37.2	624.18	4	1.57054	2.79531
282	37.2	602.83	4	1.57054	2.78019
283	37.2	626.47	4	1.57054	2.7969
284	37.3	636.25	3	1.57171	2.80363
285	37.3	660.85	4	1.57171	2.8201
286	37.5	678.24	4	1.57403	2.83138
287	37.5	687.98	4	1.57403	2.83758
288	37.8	666.71	4	1.57749	2.82394
289	37.8	693.15	4	1.57749	2.84083
290	38.1	700.65	4	1.58092	2.8455
291	38.1	710.25	4	1.58092	2.85141
292	38.4	712.98	4	1.58433	2.85308
293	38.4	705.12	4	1.58433	2.84826
294	39.1	708.9	4	1.59218	2.85058
295	39.1	738.64	4	1.59218	2.86843
296	39.1	746.18	4	1.59218	2.87284
297	39.1	772.8	4	1.59218	2.88807
298	39.5	770.96	4	1.5966	2.88703
299	39.5	780.25	4	1.5966	2.89223
300	39.5	760.2	4	1.5966	2.88093
301	39.5	775.98	4	1.5966	2.88985
302	40.1	808.2	4	1.60314	2.90752
303	40.5	812.5	4	1.60746	2.90982
304	40.9	880.6	4	1.61172	2.94478
305	41.2	898.78	4	1.6149	2.95365
306	41	878.25	4	1.61278	2.94362
307	40.8	905.7	4	1.61066	2.95698
308	42.1	941.64	4	1.62428	2.97388
309	41.5	915.2	4	1.61805	2.96152
310	42.1	935.8	4	1.62428	2.97118
311	41.5	920.25	4	1.61805	2.96391
312	42.3	950.8	4	1.62634	2.97809
313	42.5	941.36	4	1.62839	2.97376
314	41.6	922.83	4	1.61909	2.96512
315	41.9	925.2	4	1.62221	2.96624
316	43.2	930.52	5	1.63548	2.96873
317	43.1	962.9	5	1.63448	2.98358
318	43.5	976.2	5	1.63849	2.98954
319	40.8	895.3	4	1.61066	2.95197
320	41.8	935.4	4	1.62118	2.971
321	40.6	912.66	4	1.60853	2.96031
322	41	895.28	4	1.61278	2.95196
323	40.6	914.34	4	1.60853	2.96111
324	41.2	923.85	4	1.6149	2.9656
325	43.5	1020.9	5	1.63849	3.00898
	Average Length		28.8074
	Std. Deviation		6.56677
	Average Weight		337.404
	Std. Deviation		242.521

## Sheet: Regresyon
ÖZET ÇIKIŞI
Regresyon İstatistikleri
Çoklu R	0.993951
R Kare	0.987938								ts= b – 3/sb
Ayarlı R Kare	0.987901
Standart Hata	0.0332785							ttest	3.9282
Gözlem	325							t0,05, N>300	1.96
ANOVA								Bulduğumuz ttest değeri (3,92), ttablo değerinden (1,96) büyük olduğu için b değeri (3,07) pozitif allometrik ve istatistiksel olarak anlamlı (P < 0.05).
	df	SS	MS	F	Anlamlılık F
Regresyon	1	29.298	29.298	26455.2	0
Fark	323	0.357709	0.00110746
Toplam	324	29.6557
	Katsayılar	Standart Hata	t Stat	P-değeri	Düşük %95	Yüksek %95	Düşük 95,0%	Yüksek 95,0%
Kesişim	-2.03037	0.0274392	-73.9952	1.32624e-204	-2.08435	-1.97639	-2.08435	-1.97639
X Değişkeni 1	3.07425	0.0189009	162.651	0	3.03706	3.11143	3.03706	3.11143

## Sheet: K
Sex	N	TL min–max	Mean TL ± SD (cm)	W min–max (g)	Mean W ± SD	W = aLb
		(cm)				a	b	R2		W calculate	K value
Unsexes	325	16.7-43.5	28.8±6.5	51.75-1020.90	337.40±242.52	0.009	3.0839	0.9941		285.012	1.18381

## Sheet: Von calculation
von Bertalanffy	parameter determination based on mean length-at-age data
Chapman's method
age	1	2	3	4	5
mean length at age(cm)	21.8	26.6	33.4	39.1	43.3
regression:
x=lt	21.8	26.6	33.4	39.1	43.3
y=lt+1-lt	4.8	6.8	5.7	4.2					delete the last y
Chapman line equation
y=	7.07307	-0.0561811	x	r=	-0.376689
calculation of parameters:
K=-ln(b+1)=		0.0578209
Linf(x para y=0)=		125.898	cm
to=t+(1/K)ln((linf-lt)/(linf))
t=1>>>to=		-2.28842
t=2>>>to=		-2.10486
t=3>>>to=		-2.33173
to=		-2.24167
growth equation >>>>>>>>>			Lt=	125.898	(1-exp	-0.0578209	(t-	-2.24167	))
	SIMULATION:
t	Lt
0	15.305	cm
1	21.5182	cm
2	27.3824	cm
3	32.9171	cm
4	38.1408	cm
5	43.0711	cm
6	47.7244	cm
7	52.1163	cm
8	56.2614	cm
9	60.1736	cm
10	63.8661	cm

## Sheet: Genetic statistic
Statistic	Value
Tajima's D	-0.943751
Fu's Fs	-0.034
Fu ve Li's D	1.15702
Fu ve Li's F	0.44446
Achaz Y	-1.87285
Strobeck's S	0.662

## Sheet: Fulton
K=(W/L3)*100
Fulton’s condition factor (K)
	L	W
Age	TL ort	W ort	L3	K			Age	K
1	21.8	125.91	10360.2	1.21532			1	1.21532
2	26.6	223.31	18821.1	1.18649			2	1.18649
3	33.4	454.4	37259.7	1.21955			3	1.21955
4	39.1	760.1	59776.5	1.27157			4	1.27157
5	43.3	972.63	81182.7	1.19807			5	1.19807
Avarege	28.8	337.4	23887.9	1.41243

## Sheet: Age
No	TB (cm)	AĞ	Yaş	Ort. Boy	Std. Sapma	Sıra																				K=(W/L3)*100
2	16.7	51.75	1			1																				Fulton’s condition factor (K)
1	16.7	55.75	1			2					Age	15-25	25-35	35-45													L	W
3	17.3	58.05	1			3					1	99	0	0												Age	TL ort	W ort	L3	K
4	17.4	58.25	1			4					2	25	78	0												1	21.8	125.91	10360.2	1.21532
5	18.5	73.25	1			5					3	0	56	12												2	26.6	223.31	18821.1	1.18649
6	18.6	74.48	1			6					4	0	0	52												3	33.4	454.4	37259.7	1.21955
7	19.8	91.92	1			7					5	0	0	4												4	39.1	760.1	59776.5	1.27157
8	20	121.29	1			8																				5	43.3	972.63	81182.7	1.19807
10	20.1	91.3	1			9																				Avarege	28.8	337.4	23887.9	1.41243
11	20.2	87.2	1			10
9	20.3	125.35	1			11
13	20.5	88.5	1			12
12	20.5	109.47	1			13
14	20.5	109.53	1			14
15	20.6	121.22	1			15
22	20.8	115.6	1			16
19	20.9	111.66	1			17
18	20.9	119.17	1			18
21	20.9	121.2	1			19
17	20.9	122.26	1			20
16	20.9	129.12	1			21
29	21	99.25	1			22
32	21	100.78	1			23
33	21	122.55	1			24
34	21	126.46	1			25
26	21.1	108.3	1			26
31	21.1	117.5	1			27
20	21.1	125.21	1			28
30	21.2	115.2	1			29
28	21.2	116.52	1			30
25	21.2	132.13	1			31
35	21.3	106.9	1			32
23	21.3	108.21	1			33
36	21.4	106.7	1			34
27	21.4	112.16	1			35
24	21.4	121.78	1			36
37	21.5	125.87	1			37
40	21.5	132.57	1			38
38	21.5	135.77	1			39
41	21.6	129.65	1			40
42	21.6	137.23	1			41
43	21.6	142.36	1			42
44	21.6	152.47	1			43
45	21.8	127.57	1			44
39	21.8	128.36	1			45
47	21.8	134.26	1			46
46	21.8	138.59	1			47
49	21.9	106.4	1			48
48	21.9	112.58	1			49
51	22	126.88	1			50
53	22	128.9	1			51
50	22	132.7	1			52
52	22	139.2	1			53
54	22.1	131.5	1			54
55	22.1	131.78	1			55
56	22.2	133.78	1			56
57	22.2	141.3	1			57
61	22.4	127.25	1			58
60	22.4	130.15	1			59
59	22.4	135.62	1			60
58	22.4	142.25	1			61
65	22.5	122.52	1			62
64	22.5	128.69	1			63
62	22.5	130.68	1			64
63	22.5	132.78	1			65
66	22.7	125.69	1			66
67	22.7	127.17	1			67
69	22.8	120.18	1			68
70	22.8	122.5	1			69
68	22.8	125.48	1			70
74	22.8	130.62	1			71
77	22.8	151.27	1			72
71	22.9	123.78	1			73
72	22.9	131.65	1			74
78	22.9	132.02	1			75
73	22.9	135.9	1			76
75	22.9	136.89	1			77
76	22.9	140.68	1			78
79	23.1	147.98	1			79
81	23.2	139.23	1			80
84	23.2	141.22	1			81
82	23.2	142.98	1			82
80	23.2	145.2	1			83
83	23.2	157.25	1			84
85	23.3	157.6	1			85
86	23.4	154.98	1			86
87	23.5	156.78	1			87
88	23.6	142.17	1			88
89	23.6	159.54	1			89
90	23.7	162.65	1			90
91	23.8	137.94	1			91
95	23.9	138.45	1			92
92	23.9	148.32	1			93
94	23.9	158.12	1			94
93	23.9	168.59	1			95
101	24.1	176.24	1			96
111	24.2	149.19	1			97
110	24.2	175.47	1	21.8133	1.5447	98
98	24	154.56	2			99	1
96	24	159.24	2			100	2
97	24	171.58	2			101	3
99	24	198.67	2			102	4
100	24.1	172.56	2			103	5
102	24.1	175.68	2			104	6
103	24.1	179.65	2			105	7
106	24.2	142.69	2			106	8
107	24.2	144.36	2			107	9
104	24.2	154.2	2			108	10
105	24.2	157.58	2			109	11
109	24.2	167.69	2			110	12
108	24.2	170.25	2			111	13
114	24.3	176.53	2			112	14
119	24.3	177.36	2			113	15
112	24.3	178.22	2			114	16
113	24.3	182.14	2			115	17
115	24.4	173.29	2			116	18
116	24.5	178.98	2			117	19
117	24.6	181.22	2			118	20
118	24.7	174.49	2			119	21
122	24.8	179.52	2			120	22
121	24.8	186.12	2			121	23
123	24.8	189.22	2			122	24
120	24.8	192.56	2			123	25
125	25.1	186.14	2			26	1
127	25.2	182.22	2			27	2
124	25.2	190.58	2			28	3
126	25.4	190.87	2			29	4
131	25.5	186.5	2			30	5
128	25.5	190.27	2			31	6
129	25.5	191.22	2			32	7
130	25.5	195.25	2			33	8
133	25.8	182.27	2			34	9
135	25.8	188.78	2			35	10
132	25.8	192.37	2			36	11
134	25.8	195.68	2			37	12
138	25.9	186.28	2			38	13
136	25.9	189.88	2			39	14
137	25.9	195.36	2			40	15
139	26	200.58	2			41	16
141	26	207.69	2			42	17
140	26	215.77	2			43	18
142	26.2	212.52	2			44	19
144	26.2	215.66	2			45	20
143	26.2	217.25	2			46	21
145	26.3	200.78	2			47	22
147	26.4	199.25	2			48	23
146	26.4	205.3	2			49	24
148	26.5	215.25	2			50	25
150	26.8	188.92	2			51	26
149	26.8	198.2	2			52	27
152	26.9	188.24	2			53	28
159	26.9	192.5	2			54	29
151	26.9	195.3	2			55	30
156	26.9	195.87	2			56	31
157	26.9	199.2	2			57	32
155	26.9	199.64	2			58	33
158	26.9	201.15	2			59	34
153	26.9	201.25	2			60	35
154	26.9	205.35	2			61	36
162	27.1	208.74	2			62	37
160	27.1	210.58	2			63	38
161	27.1	212.25	2			64	39
163	27.2	212.5	2			65	40
164	27.2	215.29	2			66	41
165	27.2	216.28	2			67	42
168	27.4	219.78	2			68	43
167	27.4	225.17	2			69	44
166	27.4	230.89	2			70	45
169	27.6	212.8	2			71	46
172	27.6	220.35	2			72	47
171	27.6	220.87	2			73	48
173	27.6	222.13	2			74	49
170	27.6	228.69	2			75	50
174	27.6	232.18	2			76	51
175	27.8	232.35	2			77	52
177	27.8	240.25	2			78	53
176	27.8	242.5	2			79	54
179	28.1	235.89	2			80	55
178	28.1	254.12	2			81	56
180	28.1	287.96	2			82	57
182	28.2	278.3	2			83	58
181	28.2	298.23	2			84	59
183	28.2	308.39	2			85	60
184	28.4	279.45	2			86	61
185	28.4	285.11	2			87	62
186	28.4	300.87	2			88	63
187	28.6	290.34	2			89	64
188	28.6	305.2	2			90	65
189	28.6	308.25	2			91	66
191	29.4	315.3	2			92	67
190	29.4	320.1	2			93	68
192	29.4	322.9	2			94	69
193	29.4	329.2	2			95	70
194	29.4	331.25	2			96	71
195	29.4	342.2	2			97	72
198	29.7	319.78	2			98	73
197	29.7	325.2	2			99	74
196	29.7	329.17	2			100	75
211	32.2	400.17	2			101	76
216	32.3	402.95	2			102	77
215	32.3	410.25	2	26.6612	1.91097	103	78
199	30.4	330.54	3				1
200	30.4	335.17	3				2
201	30.4	342.89	3				3
202	30.9	366.95	3				4
203	30.9	372.12	3				5
204	30.9	376.89	3				6
205	32.1	377.52	3				7
207	32.1	387.52	3				8
206	32.1	388.47	3				9
209	32.2	397.21	3				10
208	32.2	398.14	3				11
213	32.2	399.47	3				12
212	32.2	401.78	3				13
210	32.2	405.15	3				14
214	32.3	405.23	3				15
219	32.5	403.58	3				16
218	32.5	405.82	3				17
217	32.5	413.22	3				18
220	32.6	402.57	3				19
222	32.6	409.22	3				20
221	32.6	412.57	3				21
224	32.8	400.89	3				22
226	32.8	411.54	3				23
223	32.8	413.98	3				24
225	32.8	415.2	3				25
228	32.8	420.89	3				26
227	32.8	421.36	3				27
229	32.9	408.48	3				28
230	32.9	419.58	3				29
231	32.9	420.37	3				30
233	33.1	418.25	3				31
232	33.1	423.28	3				32
234	33.1	437.35	3				33
236	33.5	437.9	3				34
237	33.5	445.88	3				35
235	33.5	447.2	3				36
238	33.5	468.9	3				37
239	33.5	477.24	3				38
243	33.6	444.98	3				39
242	33.6	456.97	3				40
241	33.6	465.6	3				41
240	33.6	470.85	3				42
244	33.7	453.17	3				43
245	33.7	468.58	3				44
247	33.8	472.58	3				45
246	33.8	478.25	3				46
248	33.9	479.99	3				47
249	33.9	483.15	3				48
250	34.1	485.2	3				49
251	34.1	498.55	3				50
252	34.4	506.78	3				51
253	34.4	512.22	3				52
254	34.5	508.34	3				53
255	34.5	513.32	3				54
256	34.7	518.34	3				55
257	34.7	528.39	3				56
259	35.1	510.89	3				1
258	35.1	539.11	3				2
261	35.2	543.37	3				3
260	35.2	548.52	3				4
263	35.4	541.22	3				5
262	35.4	545.28	3				6
265	35.7	549.88	3				7
264	35.7	552.69	3				8
266	35.9	568.9	3				9
267	35.9	575.36	3				10
280	37.2	622.36	3				11
284	37.3	636.25	3	33.4235	1.49478		12
268	36.1	572.58	4				1
269	36.1	620.14	4				2
271	36.2	587.85	4				3
270	36.2	598.57	4				4
272	36.5	599.7	4				5
273	36.5	602.14	4				6
275	36.9	612.25	4				7
274	36.9	615.17	4				8
276	37	612.52	4				9
277	37	622.28	4				10
278	37.1	619.71	4				11
279	37.1	625.1	4				12
282	37.2	602.83	4				13
281	37.2	624.18	4				14
283	37.2	626.47	4				15
285	37.3	660.85	4				16
286	37.5	678.24	4				17
287	37.5	687.98	4				18
288	37.8	666.71	4				19
289	37.8	693.15	4				20
290	38.1	700.65	4				21
291	38.1	710.25	4				22
293	38.4	705.12	4				23
292	38.4	712.98	4				24
294	39.1	708.9	4				25
295	39.1	738.64	4				26
296	39.1	746.18	4				27
297	39.1	772.8	4				28
300	39.5	760.2	4				29
298	39.5	770.96	4				30
301	39.5	775.98	4				31
299	39.5	780.25	4				32
302	40.1	808.2	4				33
303	40.5	812.5	4				34
321	40.6	912.66	4				35
323	40.6	914.34	4				36
319	40.8	895.3	4				37
307	40.8	905.7	4				38
304	40.9	880.6	4				39
306	41	878.25	4				40
322	41	895.28	4				41
305	41.2	898.78	4				42
324	41.2	923.85	4				43
309	41.5	915.2	4				44
311	41.5	920.25	4				45
314	41.6	922.83	4				46
320	41.8	935.4	4				47
315	41.9	925.2	4				48
310	42.1	935.8	4				49
308	42.1	941.64	4				50
312	42.3	950.8	4				51
313	42.5	941.36	4	39.0865	2.01095		52
317	43.1	962.9	5
316	43.2	930.52	5
318	43.5	976.2	5
325	43.5	1020.9	5	43.325	0.206155
	28.8074	337.404
	6.56677	242.521

## Sheet: 1
No	Total Lenght (cm)	Weight (g)	Age	Average Length	Std. Deviation
2	16.7	51.75	1
1	16.7	55.75	1
3	17.3	58.05	1
4	17.4	58.25	1
5	18.5	73.25	1
6	18.6	74.48	1
7	19.8	91.92	1
8	20	121.29	1
10	20.1	91.3	1
11	20.2	87.2	1
9	20.3	125.35	1
13	20.5	88.5	1
12	20.5	109.47	1
14	20.5	109.53	1
15	20.6	121.22	1
22	20.8	115.6	1
19	20.9	111.66	1
18	20.9	119.17	1
21	20.9	121.2	1
17	20.9	122.26	1
16	20.9	129.12	1
29	21	99.25	1
32	21	100.78	1
33	21	122.55	1
34	21	126.46	1
26	21.1	108.3	1
31	21.1	117.5	1
20	21.1	125.21	1
30	21.2	115.2	1
28	21.2	116.52	1
25	21.2	132.13	1
35	21.3	106.9	1
23	21.3	108.21	1
36	21.4	106.7	1
27	21.4	112.16	1
24	21.4	121.78	1
37	21.5	125.87	1
40	21.5	132.57	1
38	21.5	135.77	1
41	21.6	129.65	1
42	21.6	137.23	1
43	21.6	142.36	1
44	21.6	152.47	1
45	21.8	127.57	1
39	21.8	128.36	1
47	21.8	134.26	1
46	21.8	138.59	1
49	21.9	106.4	1
48	21.9	112.58	1
51	22	126.88	1
53	22	128.9	1
50	22	132.7	1
52	22	139.2	1
54	22.1	131.5	1
55	22.1	131.78	1
56	22.2	133.78	1
57	22.2	141.3	1
61	22.4	127.25	1
60	22.4	130.15	1
59	22.4	135.62	1
58	22.4	142.25	1
65	22.5	122.52	1
64	22.5	128.69	1
62	22.5	130.68	1
63	22.5	132.78	1
66	22.7	125.69	1
67	22.7	127.17	1
69	22.8	120.18	1
70	22.8	122.5	1
68	22.8	125.48	1
74	22.8	130.62	1
77	22.8	151.27	1
71	22.9	123.78	1
72	22.9	131.65	1
78	22.9	132.02	1
73	22.9	135.9	1
75	22.9	136.89	1
76	22.9	140.68	1
79	23.1	147.98	1
81	23.2	139.23	1
84	23.2	141.22	1
82	23.2	142.98	1
80	23.2	145.2	1
83	23.2	157.25	1
85	23.3	157.6	1
86	23.4	154.98	1
87	23.5	156.78	1
88	23.6	142.17	1
89	23.6	159.54	1
90	23.7	162.65	1
91	23.8	137.94	1
95	23.9	138.45	1
92	23.9	148.32	1
94	23.9	158.12	1
93	23.9	168.59	1
101	24.1	176.24	1
111	24.2	149.19	1
110	24.2	175.47	1	21.8133	1.5447
				125.912	24.0532

## Sheet: 2
No	Total Lenght (cm)	Weight (g)	Age	Average Length	Std. Deviation
98	24	154.56	2
96	24	159.24	2
97	24	171.58	2
99	24	198.67	2
100	24.1	172.56	2
102	24.1	175.68	2
103	24.1	179.65	2
106	24.2	142.69	2
107	24.2	144.36	2
104	24.2	154.2	2
105	24.2	157.58	2
109	24.2	167.69	2
108	24.2	170.25	2
114	24.3	176.53	2
119	24.3	177.36	2
112	24.3	178.22	2
113	24.3	182.14	2
115	24.4	173.29	2
116	24.5	178.98	2
117	24.6	181.22	2
118	24.7	174.49	2
122	24.8	179.52	2
121	24.8	186.12	2
123	24.8	189.22	2
120	24.8	192.56	2
125	25.1	186.14	2
127	25.2	182.22	2
124	25.2	190.58	2
126	25.4	190.87	2
131	25.5	186.5	2
128	25.5	190.27	2
129	25.5	191.22	2
130	25.5	195.25	2
133	25.8	182.27	2
135	25.8	188.78	2
132	25.8	192.37	2
134	25.8	195.68	2
138	25.9	186.28	2
136	25.9	189.88	2
137	25.9	195.36	2
139	26	200.58	2
141	26	207.69	2
140	26	215.77	2
142	26.2	212.52	2
144	26.2	215.66	2
143	26.2	217.25	2
145	26.3	200.78	2
147	26.4	199.25	2
146	26.4	205.3	2
148	26.5	215.25	2
150	26.8	188.92	2
149	26.8	198.2	2
152	26.9	188.24	2
159	26.9	192.5	2
151	26.9	195.3	2
156	26.9	195.87	2
157	26.9	199.2	2
155	26.9	199.64	2
158	26.9	201.15	2
153	26.9	201.25	2
154	26.9	205.35	2
162	27.1	208.74	2
160	27.1	210.58	2
161	27.1	212.25	2
163	27.2	212.5	2
164	27.2	215.29	2
165	27.2	216.28	2
168	27.4	219.78	2
167	27.4	225.17	2
166	27.4	230.89	2
169	27.6	212.8	2
172	27.6	220.35	2
171	27.6	220.87	2
173	27.6	222.13	2
170	27.6	228.69	2
174	27.6	232.18	2
175	27.8	232.35	2
177	27.8	240.25	2
176	27.8	242.5	2
179	28.1	235.89	2
178	28.1	254.12	2
180	28.1	287.96	2
182	28.2	278.3	2
181	28.2	298.23	2
183	28.2	308.39	2
184	28.4	279.45	2
185	28.4	285.11	2
186	28.4	300.87	2
187	28.6	290.34	2
188	28.6	305.2	2
189	28.6	308.25	2
191	29.4	315.3	2
190	29.4	320.1	2
192	29.4	322.9	2
193	29.4	329.2	2
194	29.4	331.25	2
195	29.4	342.2	2
198	29.7	319.78	2
197	29.7	325.2	2
196	29.7	329.17	2
211	32.2	400.17	2
216	32.3	402.95	2
215	32.3	410.25	2	26.6612	1.91097
				223.319	58.1526

## Sheet: 3
No	Total Lenght (cm)	Weight (g)	Age	Average Length	Std. Deviation
199	30.4	330.54	3
200	30.4	335.17	3
201	30.4	342.89	3
202	30.9	366.95	3
203	30.9	372.12	3
204	30.9	376.89	3
205	32.1	377.52	3
207	32.1	387.52	3
206	32.1	388.47	3
209	32.2	397.21	3
208	32.2	398.14	3
213	32.2	399.47	3
212	32.2	401.78	3
210	32.2	405.15	3
214	32.3	405.23	3
219	32.5	403.58	3
218	32.5	405.82	3
217	32.5	413.22	3
220	32.6	402.57	3
222	32.6	409.22	3
221	32.6	412.57	3
224	32.8	400.89	3
226	32.8	411.54	3
223	32.8	413.98	3
225	32.8	415.2	3
228	32.8	420.89	3
227	32.8	421.36	3
229	32.9	408.48	3
230	32.9	419.58	3
231	32.9	420.37	3
233	33.1	418.25	3
232	33.1	423.28	3
234	33.1	437.35	3
236	33.5	437.9	3
237	33.5	445.88	3
235	33.5	447.2	3
238	33.5	468.9	3
239	33.5	477.24	3
243	33.6	444.98	3
242	33.6	456.97	3
241	33.6	465.6	3
240	33.6	470.85	3
244	33.7	453.17	3
245	33.7	468.58	3
247	33.8	472.58	3
246	33.8	478.25	3
248	33.9	479.99	3
249	33.9	483.15	3
250	34.1	485.2	3
251	34.1	498.55	3
252	34.4	506.78	3
253	34.4	512.22	3
254	34.5	508.34	3
255	34.5	513.32	3
256	34.7	518.34	3
257	34.7	528.39	3
259	35.1	510.89	3
258	35.1	539.11	3
261	35.2	543.37	3
260	35.2	548.52	3
263	35.4	541.22	3
262	35.4	545.28	3
265	35.7	549.88	3
264	35.7	552.69	3
266	35.9	568.9	3
267	35.9	575.36	3
280	37.2	622.36	3
284	37.3	636.25	3	33.4235	1.49478
				454.403	67.3959

[truncated: 2 more sheets: 4, 5]
